# Supplementary material
Source: PubMed Central journal article supplement (PMC4470288)
Supplement: NIHMS697648-supplement-Supplement_1.pdf [file NIHMS697648-supplement-Supplement_1.pdf]

## Instructions

“Next, you will see a list of the damages (and related dollar amounts) caused by the drought. These will go very quickly, so pay attention. You will be asked questions about what caused the drought and how much damage was done (in dollars).”

## Stimuli

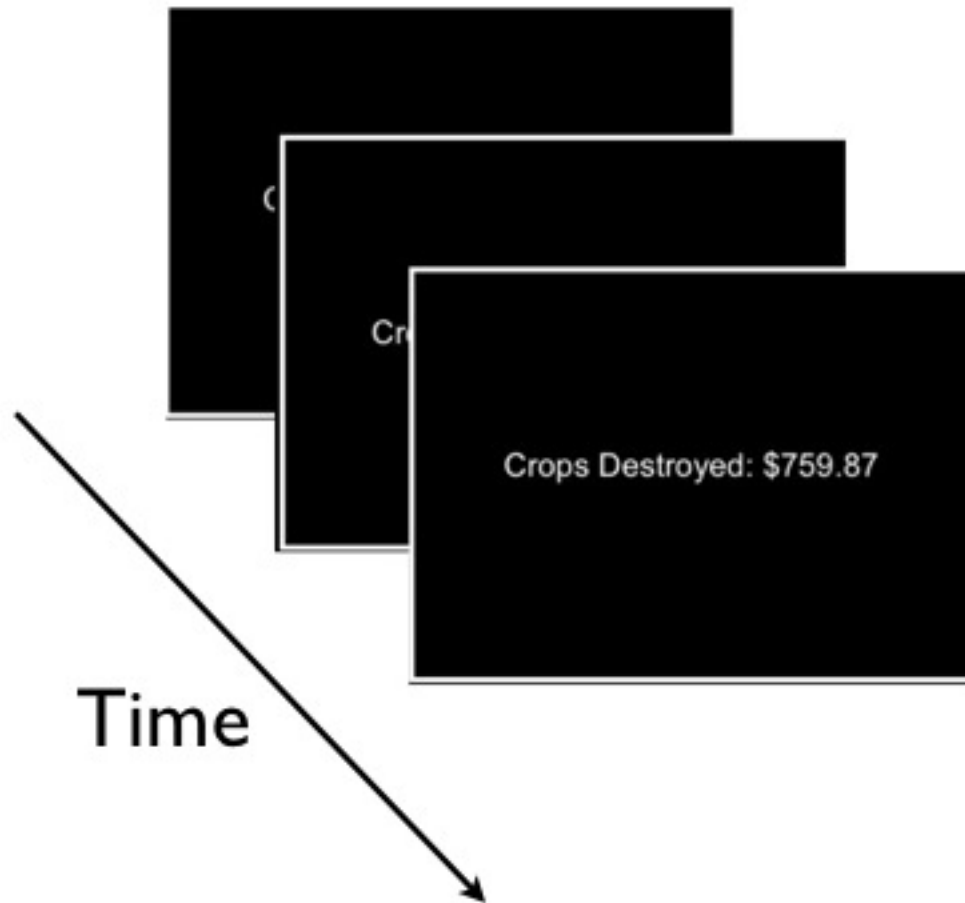

Seven harms were presented along with their associated dollar amounts (2000ms each, 300ms ITI).

## Dependent Measure

“Estimate of TOTAL cost of damage (in dollars): \_\_\_\_\_”

Figure S1. Schematic of task for Studies 4 and 5. The following alternative question wording was used for the intentional harm/separate estimates condition of Study 5: “Estimate the total of the damages, in dollars (the sum of the numbers you just saw).”
